# Supplementary material
Source: Springer Nature journal article supplement (https://www.springermedizin.de/resource/supplementary/12935_2009_234_MOESM6_ESM.pdf/9540172)

Akt/PKB (total) Vehicle Tam 4HT Dex atRA 9cRA

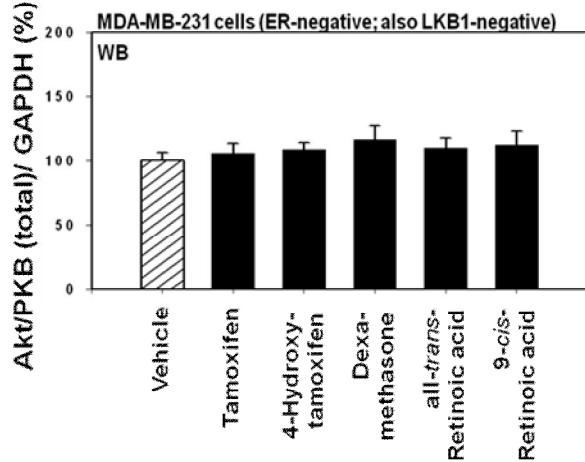

Akt/PKB (Thr308-P) Vehicle Tam 4HT Dex atRA 9cRA

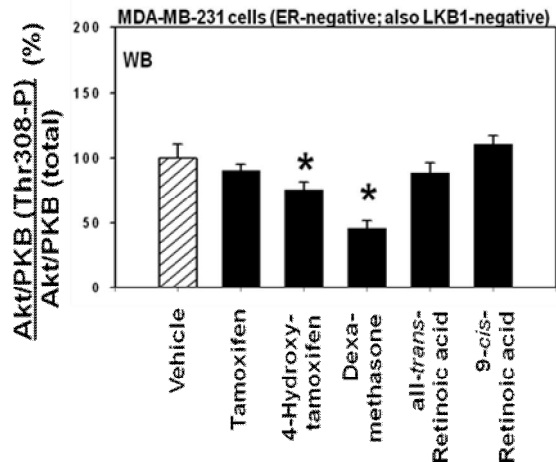

(c)

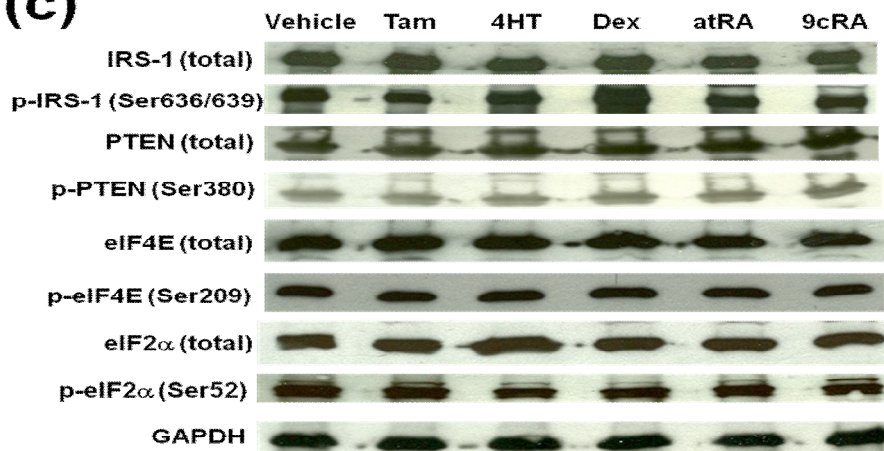

p-PDGFR $\beta$  (Tyr751) Vehicle Tam 4HT Dex atRA 9cRA

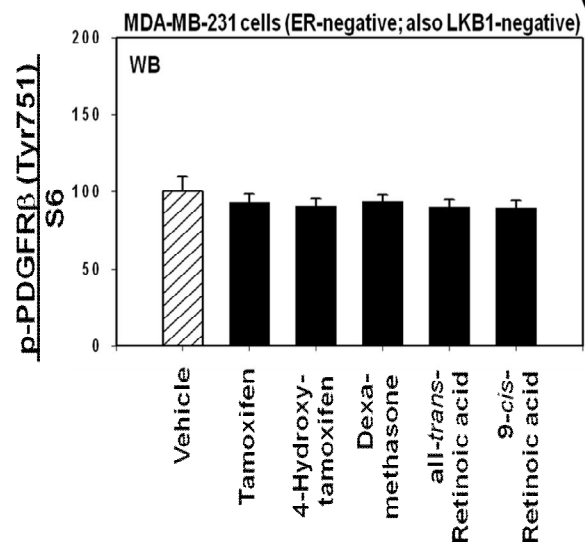

p-P44/42 MAPK or ERK1/2 (Thr202/Tyr204) Vehicle Tam 4HT Dex atRA 9cRA

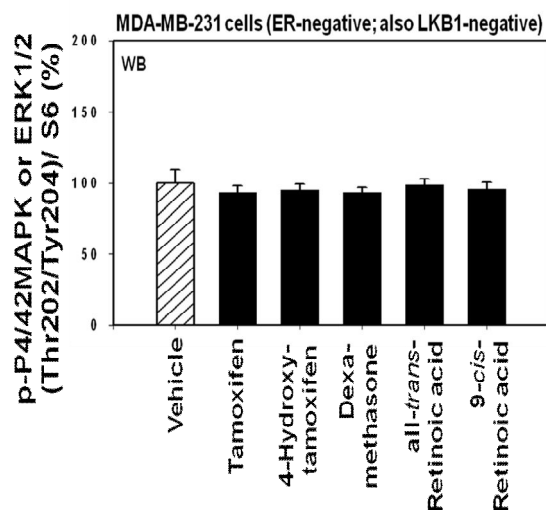

Supplement: MOESM6 [file 9540172]
